# Supplementary material for: Murine pluripotent stem cells that escape differentiation inside teratomas maintain pluripotency
Source: PeerJ. 2018 Jan 4;6:e4177. doi: 10.7717/peerj.4177 (PMC5756617; doi:10.7717/peerj.4177)
Supplement: Data S1 [file peerj-06-4177-s001.xlsx]

## Sheet: MEFs
Experiment: 17.11.14-XJZ-PYL Selected Filter: SYBR Green I / HRM Dye (465-510)
Include	Color	Pos	Name	Cp	Concentration	Standard	Status	cell
TRUE	255	A1	EF1α	14.72		0		OG2-MEFs-1
TRUE	255	A2	EF1α	14.33		0		OG2-MEFs-2
TRUE	255	A3	EF1α	14.76		0		OG2-MEFs-3
TRUE	255	A4	Gapdh	16.19		0		OG2-MEFs-1
TRUE	255	A5	Gapdh	16.14		0		OG2-MEFs-2
TRUE	255	A6	Gapdh	16.16		0		OG2-MEFs-3
TRUE	255	A7	β-tublin	21.78		0		OG2-MEFs-1
TRUE	255	A8	β-tublin	21.92		0		OG2-MEFs-2
TRUE	255	A9	β-tublin	21.71		0		OG2-MEFs-3
TRUE	255	A10	Pou5f1	31.39		0		OG2-MEFs-1
TRUE	255	A11	Pou5f1	31.82		0		OG2-MEFs-2
TRUE	255	A12	Pou5f1	32.86		0		OG2-MEFs-3
TRUE	255	B1	Nanog	30.43		0		OG2-MEFs-1
TRUE	255	B2	Nanog	30.96		0		OG2-MEFs-2
TRUE	255	B3	Nanog	30.92		0		OG2-MEFs-3
TRUE	255	B4	Lin28a	36.89		0		OG2-MEFs-1
TRUE	255	B5	Lin28a	37.02		0		OG2-MEFs-2
TRUE	255	B6	Lin28a	37.16		0		OG2-MEFs-3
TRUE	255	B7	Stella	30.98		0		OG2-MEFs-1
TRUE	255	B8	Stella	30.17		0		OG2-MEFs-2
TRUE	255	B9	Stella	30.27		0		OG2-MEFs-3
TRUE	255	B10	Stra8	36.25		0		OG2-MEFs-1
TRUE	255	B11	Stra8	37.04		0		OG2-MEFs-2
TRUE	255	B12	Stra8	36.02		0		OG2-MEFs-3
TRUE	255	C1	Vasa	30.92		0		OG2-MEFs-1
TRUE	255	C2	Vasa	30.03		0		OG2-MEFs-2
TRUE	255	C3	Vasa	30.22		0		OG2-MEFs-3
TRUE	255	C4	Dazl	33.7		0		OG2-MEFs-1
TRUE	255	C5	Dazl	33.33		0		OG2-MEFs-2
TRUE	255	C6	Dazl	33.94		0		OG2-MEFs-3
TRUE	255	C7	Sample 31	16.45		0
TRUE	255	C8	Sample 32	16.47		0
TRUE	255	C9	Sample 33	16.35		0
TRUE	255	C10	Sample 34	14.77		0
TRUE	65280	C11	Sample 35			0
TRUE	65280	C12	Sample 36			0
TRUE	65280	D1	Sample 37			0
TRUE	65280	D2	Sample 38			0
TRUE	65280	D3	Sample 39			0
TRUE	65280	D4	Sample 40			0
TRUE	65280	D5	Sample 41			0
TRUE	65280	D6	Sample 42			0
TRUE	65280	D7	Sample 43			0
TRUE	65280	D8	Sample 44			0
TRUE	65280	D9	Sample 45			0
TRUE	65280	D10	Sample 46			0
TRUE	65280	D11	Sample 47			0
TRUE	65280	D12	Sample 48			0
TRUE	65280	E1	Sample 49			0
TRUE	65280	E2	Sample 50			0
TRUE	65280	E3	Sample 51			0
TRUE	65280	E4	Sample 52			0
TRUE	65280	E5	Sample 53			0
TRUE	65280	E6	Sample 54			0
TRUE	65280	E7	Sample 55			0
TRUE	65280	E8	Sample 56			0
TRUE	65280	E9	Sample 57			0
TRUE	65280	E10	Sample 58			0
TRUE	65280	E11	Sample 59			0
TRUE	65280	E12	Sample 60			0
TRUE	65280	F1	Sample 61			0
TRUE	65280	F2	Sample 62			0
TRUE	65280	F3	Sample 63			0
TRUE	65280	F4	Sample 64			0
TRUE	65280	F5	Sample 65			0
TRUE	65280	F6	Sample 66			0
TRUE	65280	F7	Sample 67			0
TRUE	65280	F8	Sample 68			0
TRUE	65280	F9	Sample 69			0
TRUE	65280	F10	Sample 70			0
TRUE	65280	F11	Sample 71			0
TRUE	65280	F12	Sample 72			0
TRUE	65280	G1	Sample 73			0
TRUE	65280	G2	Sample 74			0
TRUE	65280	G3	Sample 75			0
TRUE	65280	G4	Sample 76			0
TRUE	65280	G5	Sample 77			0
TRUE	65280	G6	Sample 78			0
TRUE	65280	G7	Sample 79			0
TRUE	65280	G8	Sample 80			0
TRUE	65280	G9	Sample 81			0
TRUE	65280	G10	Sample 82			0
TRUE	65280	G11	Sample 83			0
TRUE	65280	G12	Sample 84			0
TRUE	65280	H1	Sample 85			0
TRUE	65280	H2	Sample 86			0
TRUE	65280	H3	Sample 87			0
TRUE	65280	H4	Sample 88			0
TRUE	65280	H5	Sample 89			0
TRUE	65280	H6	Sample 90			0
TRUE	65280	H7	Sample 91			0
TRUE	65280	H8	Sample 92			0
TRUE	65280	H9	Sample 93			0
TRUE	65280	H10	Sample 94			0
TRUE	65280	H11	Sample 95			0
TRUE	65280	H12	Sample 96			0

## Sheet: mes,mes-ft,mes-st 
Experiment: pyl20170925-1 Selected Filter: SYBR Green I / HRM Dye (465-510)
Include	Color	Pos	Name	Cp	Concentration	Standard	Status	cell
TRUE	255	A1	EF1α	14.33		0		oct4-mes-p3
TRUE	255	A2	EF1α	14.35		0		oct4-mes-p5
TRUE	255	A3	EF1α	14.07		0		oct4-mes-p6
TRUE	255	A4	EF1α	14.46		0		mes-ft-p3
TRUE	255	A5	EF1α	14.43		0		mes-ft-p5
TRUE	255	A6	EF1α	14.33		0		mes-ft-p6
TRUE	255	A7	EF1α	13.91		0		mes-st-p3
TRUE	255	A8	EF1α	13.94		0		mes-st-p5
TRUE	255	A9	EF1α	13.95		0		mes-st-p6
TRUE	255	A10	Stra8	22.55		0		oct4-mes-p3
TRUE	255	A11	Stra8	22.63		0		oct4-mes-p5
TRUE	255	A12	Stra8	22.69		0		oct4-mes-p6
TRUE	255	B1	Gapdh	15.75		0		oct4-mes-p3
TRUE	255	B2	Gapdh	15.6		0		oct4-mes-p5
TRUE	255	B3	Gapdh	15.62		0		oct4-mes-p6
TRUE	255	B4	Gapdh	15.55		0		mes-ft-p3
TRUE	255	B5	Gapdh	15.68		0		mes-ft-p5
TRUE	255	B6	Gapdh	15.67		0		mes-ft-p6
TRUE	255	B7	Gapdh	15.15		0		mes-st-p3
TRUE	255	B8	Gapdh	15.17		0		mes-st-p5
TRUE	255	B9	Gapdh	15.14		0		mes-st-p6
TRUE	255	B10	Stra8	19.46		0		mes-ft-p3
TRUE	255	B11	Stra8	19.34		0		mes-ft-p5
TRUE	255	B12	Stra8	19.28		0		mes-ft-p6
TRUE	255	C1	β-tublin	21.95		0		oct4-mes-p3
TRUE	255	C2	β-tublin	21.94		0		oct4-mes-p5
TRUE	255	C3	β-tublin	21.82		0		oct4-mes-p6
TRUE	255	C4	β-tublin	22.1		0		mes-ft-p3
TRUE	255	C5	β-tublin	22.14		0		mes-ft-p5
TRUE	255	C6	β-tublin	22.14		0		mes-ft-p6
TRUE	255	C7	β-tublin	22.02		0		mes-st-p3
TRUE	255	C8	β-tublin	22		0		mes-st-p5
TRUE	255	C9	β-tublin	22.04		0		mes-st-p6
TRUE	255	C10	Stra8	19.13		0		mes-st-p3
TRUE	255	C11	Stra8	19.16		0		mes-st-p5
TRUE	255	C12	Stra8	19.24		0		mes-st-p6
TRUE	255	D1	Pou5f1	19.35		0		oct4-mes-p3
TRUE	255	D2	Pou5f1	19.17		0		oct4-mes-p5
TRUE	255	D3	Pou5f1	19.14		0		oct4-mes-p6
TRUE	255	D4	Pou5f1	19.06		0		mes-ft-p3
TRUE	255	D5	Pou5f1	18.99		0		mes-ft-p5
TRUE	255	D6	Pou5f1	18.96		0		mes-ft-p6
TRUE	255	D7	Pou5f1	19.18		0		mes-st-p3
TRUE	255	D8	Pou5f1	19.2		0		mes-st-p5
TRUE	255	D9	Pou5f1	19.31		0		mes-st-p6
TRUE	255	D10	Vasa	23.84		0		oct4-mes
TRUE	255	D11	Vasa	23.98		0		oct4-mes
TRUE	255	D12	Vasa	23.97		0		oct4-mes
TRUE	255	E1	Nanog	20.55		0		oct4-mes-p3
TRUE	255	E2	Nanog	20.46		0		oct4-mes-p5
TRUE	255	E3	Nanog	20.54		0		oct4-mes-p6
TRUE	255	E4	Nanog	20.64		0		mes-ft-p3
TRUE	255	E5	Nanog	20.74		0		mes-ft-p5
TRUE	255	E6	Nanog	20.72		0		mes-ft-p6
TRUE	255	E7	Nanog	20.17		0		mes-st-p3
TRUE	255	E8	Nanog	20.18		0		mes-st-p5
TRUE	255	E9	Nanog	20.16		0		mes-st-p6
TRUE	255	E10	Vasa	23.89		0		mes-ft-p3
TRUE	255	E11	Vasa	23.89		0		mes-ft-p5
TRUE	255	E12	Vasa	23.71		0		mes-ft-p6
TRUE	255	F1	Lin28a	25.9		0		oct4-mes-p3
TRUE	255	F2	Lin28a	25.74		0		oct4-mes-p5
TRUE	255	F3	Lin28a	25.63		0		oct4-mes-p6
TRUE	255	F4	Lin28a	25.01		0		mes-ft-p3
TRUE	255	F5	Lin28a	24.95		0		mes-ft-p5
TRUE	255	F6	Lin28a	24.96		0		mes-ft-p6
TRUE	255	F7	Lin28a	25.03		0		mes-st-p3
TRUE	255	F8	Lin28a	24.99		0		mes-st-p5
TRUE	255	F9	Lin28a	25.04		0		mes-st-p6
TRUE	255	F10	Vasa	23.61		0		mes-st-p3
TRUE	255	F11	Vasa	23.62		0		mes-st-p5
TRUE	255	F12	Vasa	23.63		0		mes-st-p6
TRUE	255	G1	Dazl	23.17		0		oct4-mes-p3
TRUE	255	G2	Dazl	23.26		0		oct4-mes-p5
TRUE	255	G3	Dazl	23.07		0		oct4-mes-p6
TRUE	255	G4	Dazl	23.35		0		mes-ft-p3
TRUE	255	G5	Dazl	23.53		0		mes-ft-p5
TRUE	255	G6	Dazl	23.22		0		mes-ft-p6
TRUE	255	G7	Dazl	22.05		0		mes-st-p3
TRUE	255	G8	Dazl	22.13		0		mes-st-p5
TRUE	255	G9	Dazl	22.41		0		mes-st-p6
TRUE	65280	G10				0
TRUE	65280	G11				0
TRUE	65280	G12				0
TRUE	255	H1	Stella	22.52		0		oct4-mes-p3
TRUE	255	H2	Stella	22.45		0		oct4-mes-p5
TRUE	255	H3	Stella	22.47		0		oct4-mes-p6
TRUE	255	H4	Stella	22.62		0		mes-ft-p3
TRUE	255	H5	Stella	22.56		0		mes-ft-p5
TRUE	255	H6	Stella	22.59		0		mes-ft-p6
TRUE	255	H7	Stella	21.07		0		mes-st-p3
TRUE	255	H8	Stella	21.1		0		mes-st-p5
TRUE	255	H9	Stella	21.08		0		mes-st-p6
TRUE	65280	H10				0
TRUE	65280	H11				0
TRUE	65280	H12				0

## Sheet: ips,ips-ft,ips-st
Experiment: pyl20170925-2 Selected Filter: SYBR Green I / HRM Dye (465-510)
Include	Color	Pos	Name	Cp	Concentration	Standard	Status	cell
TRUE	255	A1	EF1α	14.58		0		tg-ips-p3
TRUE	255	A2	EF1α	14.51		0		tg-ips-p5
TRUE	255	A3	EF1α	14.54		0		tg-ips-p6
TRUE	255	A4	EF1α	16.29		0		ips-ft-p3
TRUE	255	A5	EF1α	16.33		0		ips-ft-p5
TRUE	255	A6	EF1α	16.33		0		ips-ft-p6
TRUE	255	A7	EF1α	14.98		0		ips-st-p3
TRUE	255	A8	EF1α	14.91		0		ips-st-p5
TRUE	255	A9	EF1α	14.97		0		ips-st-p6
TRUE	255	A10	Stra8	23.62		0		tg-ips-p3
TRUE	255	A11	Stra8	23.58		0		tg-ips-p5
TRUE	255	A12	Stra8	23.6		0		tg-ips-p6
TRUE	255	B1	Gapdh	15.51		0		tg-ips-p3
TRUE	255	B2	Gapdh	15.44		0		tg-ips-p5
TRUE	255	B3	Gapdh	15.44		0		tg-ips-p6
TRUE	255	B4	Gapdh	17.05		0		ips-ft-p3
TRUE	255	B5	Gapdh	17.07		0		ips-ft-p5
TRUE	255	B6	Gapdh	17.04		0		ips-ft-p6
TRUE	255	B7	Gapdh	16.3		0		ips-st-p3
TRUE	255	B8	Gapdh	16.28		0		ips-st-p5
TRUE	255	B9	Gapdh	16.15		0		ips-st-p6
TRUE	255	B10	Stra8	20.8		0		ips-ft-p3
TRUE	255	B11	Stra8	20.74		0		ips-ft-p5
TRUE	255	B12	Stra8	20.6		0		ips-ft-p6
TRUE	255	C1	β-tublin	21.95		0		tg-ips-p3
TRUE	255	C2	β-tublin	21.86		0		tg-ips-p5
TRUE	255	C3	β-tublin	21.92		0		tg-ips-p6
TRUE	255	C4	β-tublin	24.2		0		ips-ft-p3
TRUE	255	C5	β-tublin	24.31		0		ips-ft-p5
TRUE	255	C6	β-tublin	24.34		0		ips-ft-p6
TRUE	255	C7	β-tublin	22.93		0		ips-st-p3
TRUE	255	C8	β-tublin	22.93		0		ips-st-p5
TRUE	255	C9	β-tublin	22.91		0		ips-st-p6
TRUE	255	C10	Stra8	20.44		0		ips-st-p3
TRUE	255	C11	Stra8	20.43		0		ips-st-p5
TRUE	255	C12	Stra8	20.49		0		ips-st-p6
TRUE	255	D1	Pou5f1	19.6		0		tg-ips-p3
TRUE	255	D2	Pou5f1	19.43		0		tg-ips-p5
TRUE	255	D3	Pou5f1	19.33		0		tg-ips-p6
TRUE	255	D4	Pou5f1	21		0		ips-ft-p3
TRUE	255	D5	Pou5f1	20.88		0		ips-ft-p5
TRUE	255	D6	Pou5f1	20.87		0		ips-ft-p6
TRUE	255	D7	Pou5f1	19.67		0		ips-st-p3
TRUE	255	D8	Pou5f1	19.66		0		ips-st-p5
TRUE	255	D9	Pou5f1	19.8		0		ips-st-p6
TRUE	255	D10	Vasa	23.81		0		tg-ips-p3
TRUE	255	D11	Vasa	23.74		0		tg-ips-p5
TRUE	255	D12	Vasa	23.88		0		tg-ips-p6
TRUE	255	E1	Nanog	21.1		0		tg-ips-p3
TRUE	255	E2	Nanog	21.08		0		tg-ips-p5
TRUE	255	E3	Nanog	21.07		0		tg-ips-p6
TRUE	255	E4	Nanog	22.24		0		ips-ft-p3
TRUE	255	E5	Nanog	22.25		0		ips-ft-p5
TRUE	255	E6	Nanog	22.28		0		ips-ft-p6
TRUE	255	E7	Nanog	21.19		0		ips-st-p3
TRUE	255	E8	Nanog	21.22		0		ips-st-p5
TRUE	255	E9	Nanog	21.2		0		ips-st-p6
TRUE	255	E10	Vasa	25.08		0		ips-ft-p3
TRUE	255	E11	Vasa	25.24		0		ips-ft-p5
TRUE	255	E12	Vasa	25.14		0		ips-ft-p6
TRUE	255	F1	Lin28a	24.54		0		tg-ips-p3
TRUE	255	F2	Lin28a	24.45		0		tg-ips-p5
TRUE	255	F3	Lin28a	24.28		0		tg-ips-p6
TRUE	255	F4	Lin28a	26.59		0		ips-ft-p3
TRUE	255	F5	Lin28a	26.53		0		ips-ft-p5
TRUE	255	F6	Lin28a	26.46		0		ips-ft-p6
TRUE	255	F7	Lin28a	25.19		0		ips-st-p3
TRUE	255	F8	Lin28a	25.2		0		ips-st-p5
TRUE	255	F9	Lin28a	25.32		0		ips-st-p6
TRUE	255	F10	Vasa	24.21		0		ips-st-p3
TRUE	255	F11	Vasa	24.18		0		ips-st-p5
TRUE	255	F12	Vasa	24.34		0		ips-st-p6
TRUE	255	G1	Dazl	24.95		0		tg-ips-p3
TRUE	255	G2	Dazl	25.08		0		tg-ips-p5
TRUE	255	G3	Dazl	25.01		0		tg-ips-p6
TRUE	255	G4	Dazl	25.22		0		ips-ft-p3
TRUE	255	G5	Dazl	25.12		0		ips-ft-p5
TRUE	255	G6	Dazl	25.07		0		ips-ft-p6
TRUE	255	G7	Dazl	24.1		0		ips-st-p3
TRUE	255	G8	Dazl	24.17		0		ips-st-p5
TRUE	255	G9	Dazl	24.09		0		ips-st-p6
TRUE	65280	G10				0
TRUE	65280	G11				0
TRUE	255	G12				0
TRUE	255	H1	Stella	20.99		0		tg-ips-p3
TRUE	255	H2	Stella	21.01		0		tg-ips-p5
TRUE	255	H3	Stella	20.92		0		tg-ips-p6
TRUE	255	H4	Stella	22.63		0		ips-ft-p3
TRUE	255	H5	Stella	22.65		0		ips-ft-p5
TRUE	255	H6	Stella	22.67		0		ips-ft-p6
TRUE	255	H7	Stella	22.13		0		ips-st-p3
TRUE	255	H8	Stella	22.14		0		ips-st-p5
TRUE	255	H9	Stella	21.94		0		ips-st-p6
TRUE	65280	H10				0
TRUE	65280	H11				0
TRUE	65280	H12				0
